# Supplementary material for: Context-Specific Associations of Physical Activity and Sedentary Behavior With Cognition in Children
Source: PubMed Central journal article supplement (PMC4908213; doi:10.1093/aje/kww031), 2016-05-24
Supplement: supp_kww031_kww031supp.pdf [file supp_kww031_kww031supp.pdf]

**Web Figure 1**

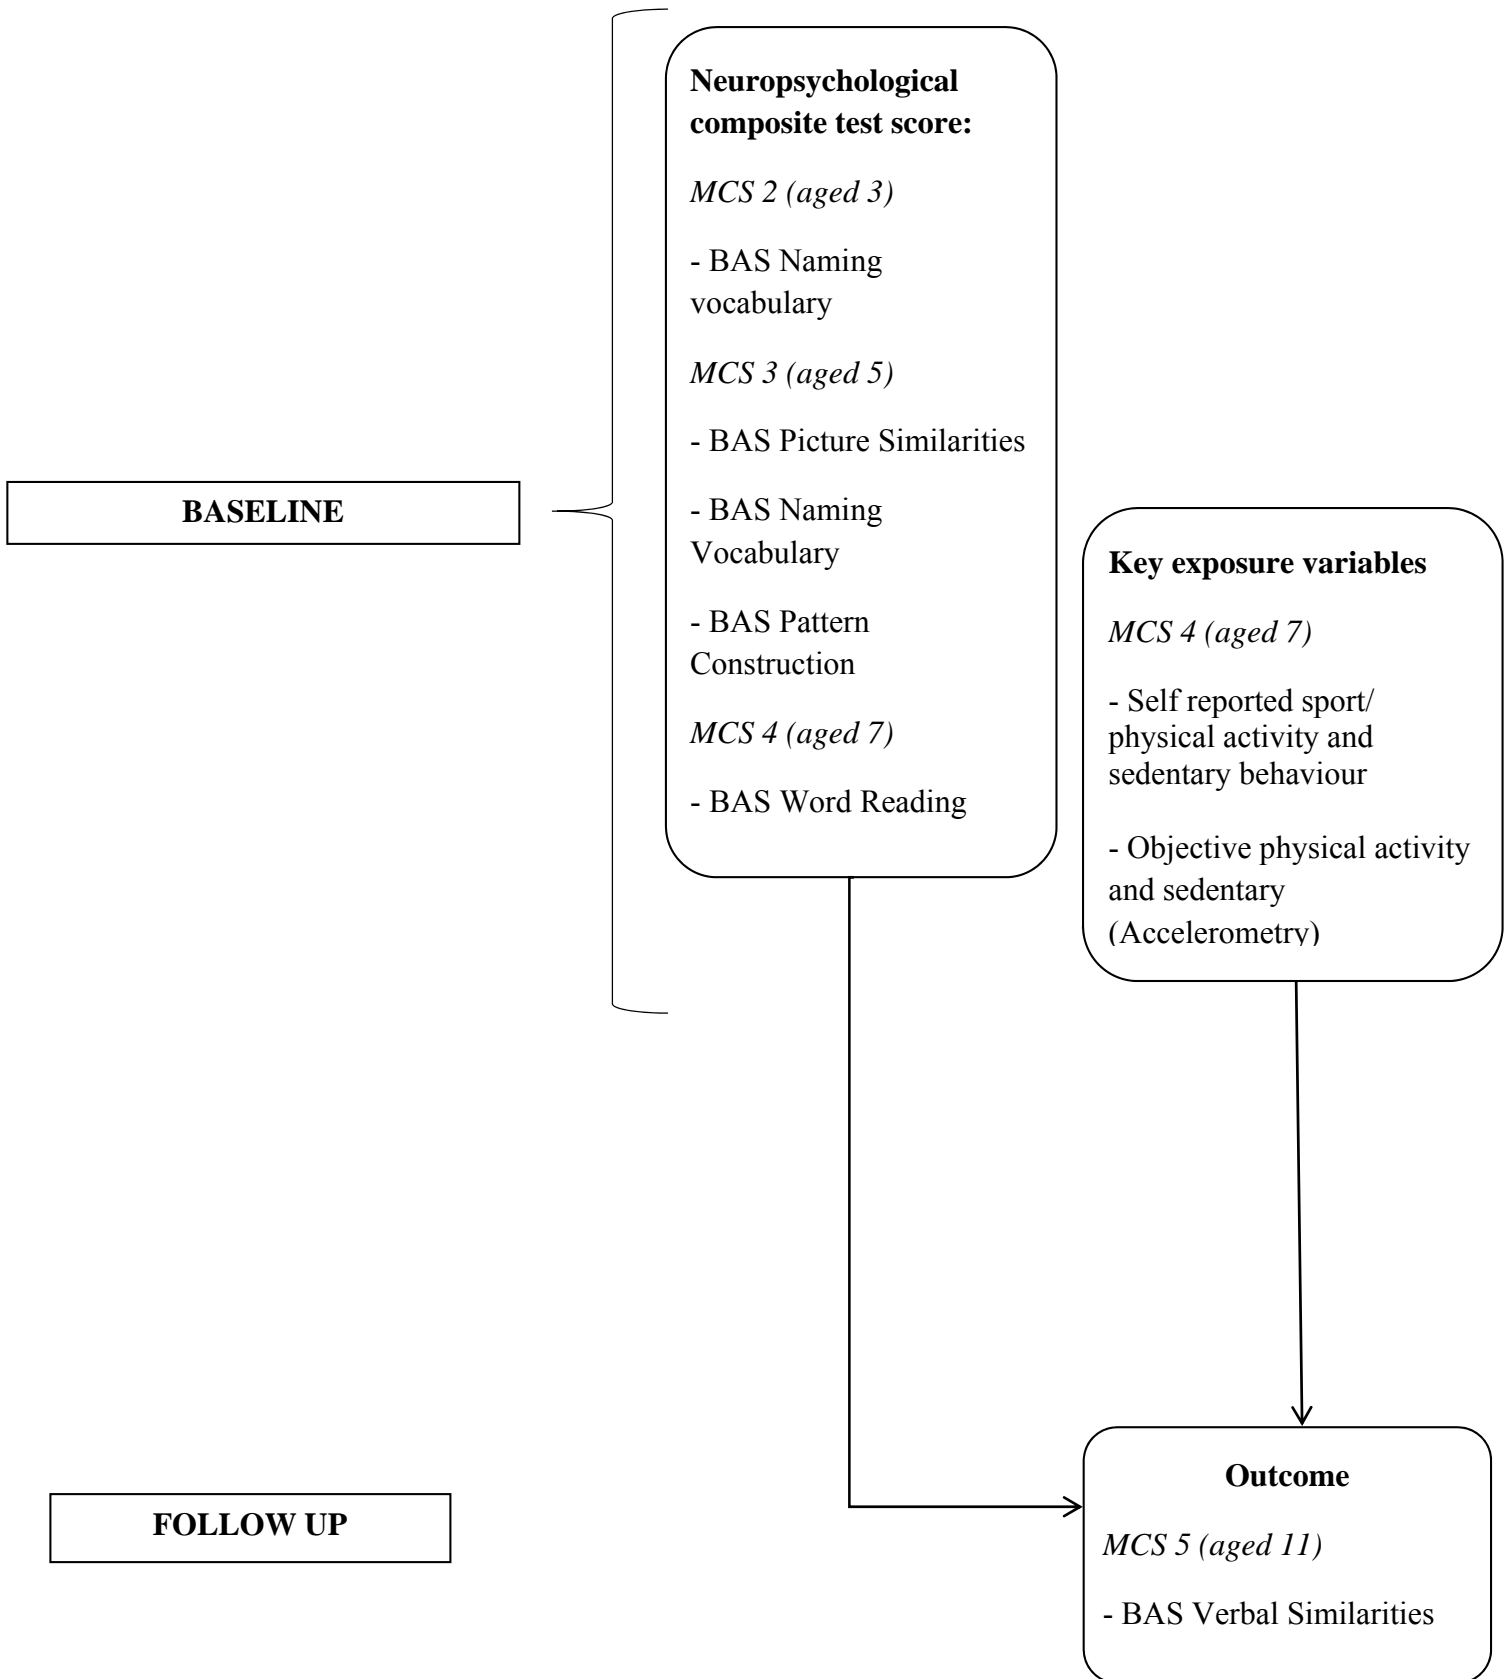

Web Table 1. Correlation between BAS cognitive scores at ages 3 to 7 in the Millennium Cohort Study, 2001-2013

|                                 | <b>Naming<br/>vocabulary<br/>(age 3)</b> | <b>Naming<br/>vocabulary<br/>(age 5)</b> | <b>Picture<br/>Similarity<br/>(age 5)</b> | <b>Pattern<br/>construction<br/>(age 5)</b> | <b>Pattern<br/>construction<br/>(age 7)</b> | <b>Word<br/>reading<br/>(age 7)</b> |
|---------------------------------|------------------------------------------|------------------------------------------|-------------------------------------------|---------------------------------------------|---------------------------------------------|-------------------------------------|
| Naming vocabulary<br>(age 3)    | 1                                        | –                                        | –                                         | –                                           | –                                           | –                                   |
| Naming vocabulary<br>(age 5)    | 0.6                                      | 1                                        | –                                         | –                                           | –                                           | –                                   |
| Picture Similarity<br>(age 5)   | 0.2                                      | 0.3                                      | 1                                         | –                                           | –                                           | –                                   |
| Pattern construction<br>(age 5) | 0.3                                      | 0.4                                      | 0.4                                       | 1                                           | –                                           | –                                   |
| Pattern construction<br>(age 7) | 0.3                                      | 0.3                                      | 0.3                                       | 0.6                                         | 1                                           | –                                   |
| Word reading<br>(age 7)         | 0.3                                      | 0.4                                      | 0.2                                       | 0.3                                         | 0.3                                         | 1                                   |

Web Table 2. Differences in characteristics between accelerometry sample and remaining cohort at age 7 in the Millennium Cohort Study, 2001-2013

|                                                                           | Accelerometry sample<br>(n=4724) |            | Remaining sample<br>(n=3738) |               |
|---------------------------------------------------------------------------|----------------------------------|------------|------------------------------|---------------|
|                                                                           | %                                | Mean (SD)  | %                            | Mean (SD)     |
| Male sex                                                                  | 48.8                             |            | 51.5*                        |               |
| White British                                                             | 90.6                             |            | 85.3**                       |               |
| Maternal age, years                                                       |                                  | 37.2 (5.5) |                              | 35.8 (5.9)**  |
| Maternal qualifications, $\geq$ National Vocational Qualification level 4 | 47.3                             |            | 35.1**                       |               |
| Income, in poverty                                                        | 18.9                             |            | 30.0**                       |               |
| Smoked during pregnancy                                                   | 26.8                             |            | 37.0**                       |               |
| Strengths and Difficulties Questionnaire score                            |                                  | 6.8 (4.7)  |                              | 8.0 (5.3)**   |
| BAS verbal similarities score                                             |                                  | 60.5 (9.0) |                              | 58.3 (10.0)** |

Abbreviations: SD, standard deviation, BAS, British Ability Scale. \*p<0.05; \*\*p<0.001

Web Table 3. Associations between accelerometry-derived sedentary time, light intensity activity and MVPA at age 7 and BAS verbal similarities score at age 11 stratified by time spent reading at age 7 (low vs. high) in the Millennium Cohort Study, 2001-2013

|                | No.  | Low (n=2741)   |           | High (n=1983) |                |           |
|----------------|------|----------------|-----------|---------------|----------------|-----------|
|                |      | B <sup>a</sup> | 95% CI    | N             | B <sup>a</sup> | 95% CI    |
| Sedentary time |      |                |           |               |                |           |
| Low            | 978  | REF            |           | 618           | REF            |           |
| Med            | 895  | 0.9            | 0.1, 1.7  | 670           | 0.1            | -0.9, 0.9 |
| High           | 868  | 0.7            | -0.2, 1.7 | 695           | 0.8            | -0.2, 1.8 |
| Light PA time  |      |                |           |               |                |           |
| Low            | 872  | REF            |           | 721           | REF            |           |
| Med            | 917  | -0.5           | -1.3, 0.3 | 690           | -0.3           | -1.1, 0.6 |
| High           | 952  | -0.7           | -1.5, 0.1 | 572           | -0.6           | -1.6, 0.3 |
| MVPA time      |      |                |           |               |                |           |
| Low            | 809  | REF            |           | 766           | REF            |           |
| Med            | 906  | -0.1           | -0.9, 0.7 | 692           | -0.1           | -0.9, 0.8 |
| High           | 1026 | -0.1           | -0.9, 0.8 | 525           | -0.9           | -1.8, 0.1 |

Abbreviations: MVPA, moderate-to-vigorous physical activity, BAS, British Ability Scale, CI, Confidence Interval, REF, Reference Category, PA, physical activity.

<sup>a</sup>Adjusted for actigraph wear-time, the composite score of previous BAS assessments at ages 3 to 7, ethnicity, maternal age, maternal qualifications, income, smoking status during pregnancy and Strengths and Difficulties Questionnaire score.

Web Table 4. Associations between accelerometry-derived sedentary time, light intensity activity and MVPA at age 7 and BAS verbal similarities score at age 11 stratified by attendance at sports/PA clubs at age 7 (low vs. high) in the Millennium Cohort Study, 2001-2013

|                | No. | Low (n=2307)   |           | High (n=2417) |                |           |
|----------------|-----|----------------|-----------|---------------|----------------|-----------|
|                |     | B <sup>a</sup> | 95% CI    | N             | B <sup>a</sup> | 95% CI    |
| Sedentary time |     |                |           |               |                |           |
| Low            | 753 |                | REF       | 843           |                | REF       |
| Med            | 748 | 1.1            | 0.2, 1.9  | 817           | 0.1            | -0.7, 0.9 |
| High           | 806 | 0.7            | -0.3, 1.7 | 757           | 1.0            | 0.1, 1.8  |
| Light PA time  |     |                |           |               |                |           |
| Low            | 782 |                | REF       | 811           |                | REF       |
| Med            | 780 | -0.1           | -0.9, 0.8 | 827           | -0.6           | -1.4, 0.2 |
| High           | 745 | -0.7           | -1.6, 0.3 | 779           | -0.8           | -1.7, 0.0 |
| MVPA time      |     |                |           |               |                |           |
| Low            | 800 |                | REF       | 775           |                | REF       |
| Med            | 795 | -0.4           | -1.2, 0.5 | 803           | 0.2            | -0.6, 1.0 |
| High           | 712 | -0.7           | -1.7, 0.2 | 839           | -0.2           | -1.0, 0.7 |

Abbreviations: MVPA, moderate-to-vigorous physical activity, BAS, British Ability Scale, CI, Confidence Interval, REF, Reference Category, PA, physical activity.

<sup>a</sup>Adjusted for actigraph wear time, the composite score of previous BAS assessments at ages 3 to 7, ethnicity, maternal age, maternal qualifications, income, smoking status during pregnancy and Strengths and Difficulties Questionnaire score.

Web Table 5. Associations between accelerometry-derived sedentary time, light intensity activity and MVPA at age 7 and BAS verbal similarities score at age 11 stratified by sex in the Millennium Cohort Study, 2001-2013

|                | Boys (n=2303) |                |           | Girls (n=2421) |                |            |
|----------------|---------------|----------------|-----------|----------------|----------------|------------|
|                | No.           | B <sup>a</sup> | 95% CI    | N              | B <sup>a</sup> | 95% CI     |
| Sedentary time |               |                |           |                |                |            |
| Low            | 867           |                | REF       | 729            |                | REF        |
| Med            | 735           | 0.4            | -0.4, 1.2 | 830            | 0.7            | -0.2, 1.5  |
| High           | 701           | 0.3            | -0.7, 1.3 | 862            | 1.1            | 0.2, 2.0   |
| Light PA time  |               |                |           |                |                |            |
| Low            | 734           |                | REF       | 859            |                | REF        |
| Med            | 788           | -0.4           | -1.3, 0.4 | 819            | -0.2           | -1.0, 0.6  |
| High           | 781           | -0.1           | -1.0, 0.8 | 743            | -1.2           | -2.1, -0.4 |
| MVPA time      |               |                |           |                |                |            |
| Low            | 489           |                | REF       | 1086           |                | REF        |
| Med            | 750           | 0.6            | -0.4, 1.5 | 848            | -0.4           | -1.2, 0.3  |
| High           | 1064          | 0.4            | -0.6, 1.2 | 487            | -1.1           | -2.0, -0.3 |

Abbreviations: MVPA, moderate-to-vigorous physical activity, BAS, British Ability Scale, CI, Confidence Interval, REF, Reference Category, PA, physical activity.

<sup>a</sup>Adjusted for actigraph wear time, the composite score of previous BAS assessments at ages 3 to 7, ethnicity, maternal age, maternal qualifications, income, smoking status during pregnancy and Strengths and Difficulties Questionnaire score.
